# Supplementary material for: Prevalence, predictors, and mortality of bloodstream infections due to methicillin-resistant Staphylococcus aureus in patients with malignancy: systemic review and meta-analysis
Source: PubMed Central journal article supplement (PMC7809798; doi:10.1186/s12879-021-05763-y), 2021-01-14

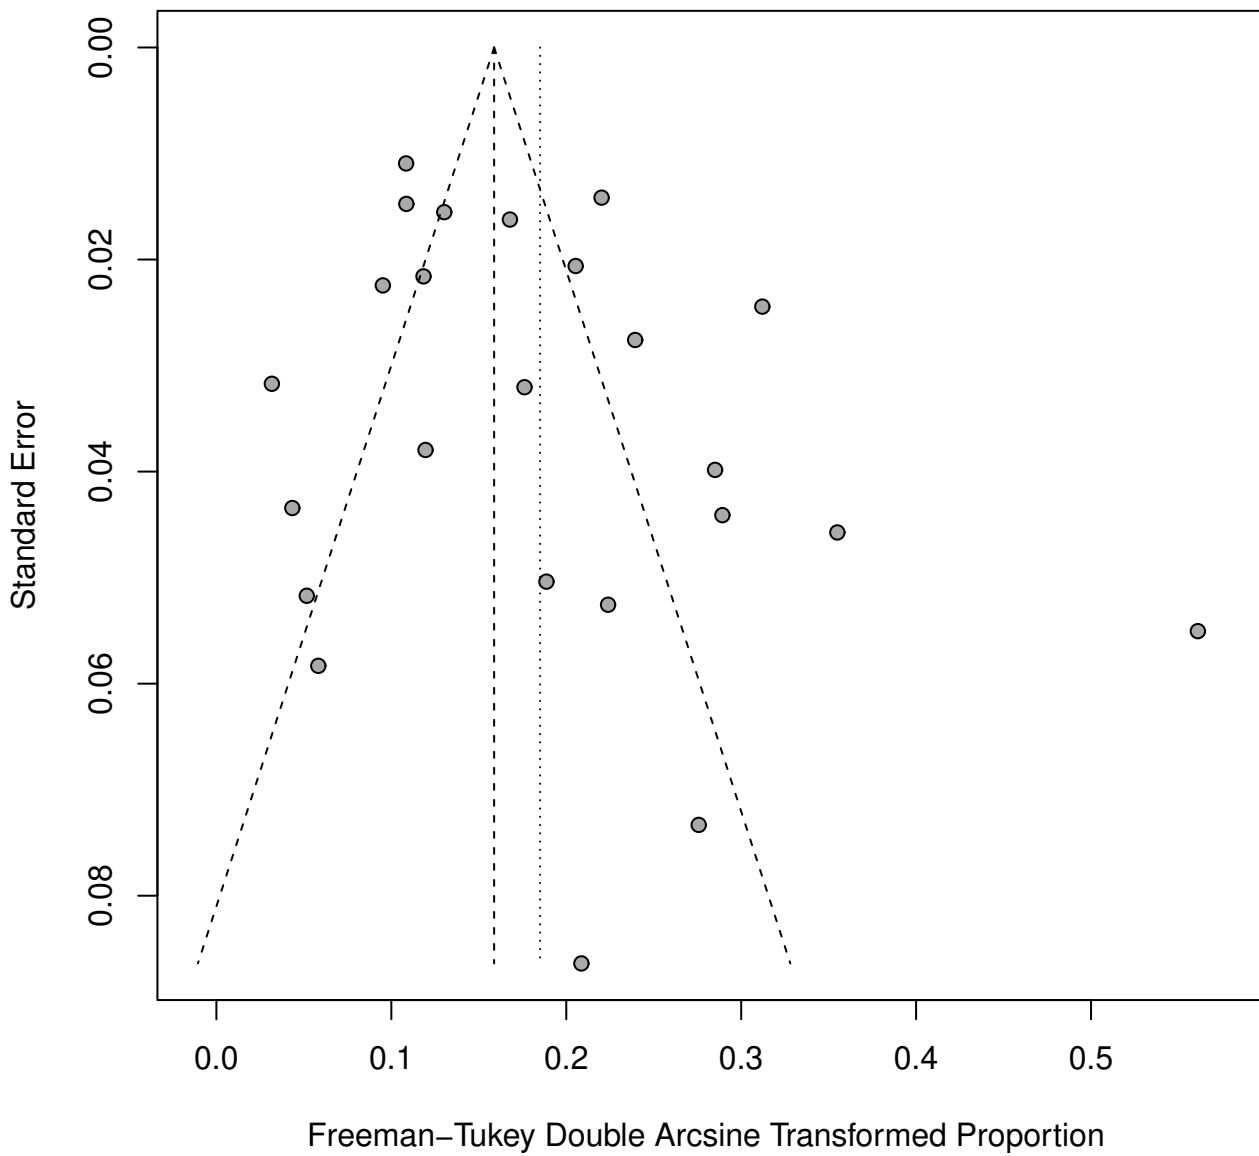

Supplement: 12879_2021_5763_MOESM1_ESM.pdf [file 12879_2021_5763_MOESM1_ESM.pdf]
